# Supplementary material
Source: MDPI journal article supplement (https://www.mdpi.com/1996-1073/16/3/1124)
Supplement: s1 [file s1]

**Supporting Information**

**Porous-Structured Three-Dimensional Iron Phosphides Nanosheets for  
Enhanced Oxygen Evolution Reaction**

*Sundaramoorthy Marimuthu, Ayyavu Shankar, and Govindhan Maduraiveeran\**

Materials Electrochemistry Laboratory, Department of Chemistry, SRM Institute of Science and  
Technology, Kattankulathur, Tamil Nadu-603 203, India

\*Corresponding Author E-mail: *maduraig@srmist.edu.in*

**Table S1.** EIS data derived from Nyquist plots of **Figure. 7.**

| <b>Electrodes</b> | <b><math>E_{\text{app}}</math> / V</b> | <b><math>R_s</math> [<math>\Omega \text{ cm}^2</math>]</b> | <b><math>R_p</math> [<math>\Omega \text{ cm}^2</math>]</b> | <b><math>C</math> [mF <math>\text{cm}^2</math>]</b> |
|-------------------|----------------------------------------|------------------------------------------------------------|------------------------------------------------------------|-----------------------------------------------------|
| PS-3D-            |                                        |                                                            |                                                            |                                                     |
| FeP@NiO Ni        |                                        | 2.47                                                       | 3.34                                                       | 11.93                                               |
| CoP@NiO Ni        | 1.49                                   | 3.63                                                       | 3.92                                                       | 40.56                                               |
| NiP@NiO Ni        |                                        | 3.55                                                       | 12.33                                                      | 20.45                                               |
| CuP@NiO Ni        |                                        | 3.35                                                       | 6.49                                                       | 38.80                                               |

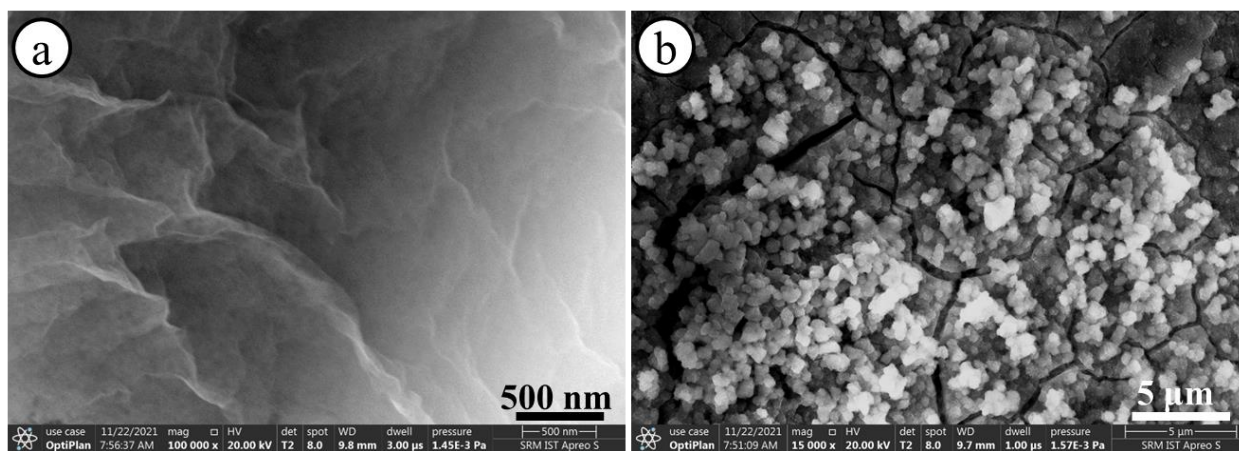

**Figure S1.** HR-SEM images of FeP nanostructures with high (a) and low (b) magnification images.

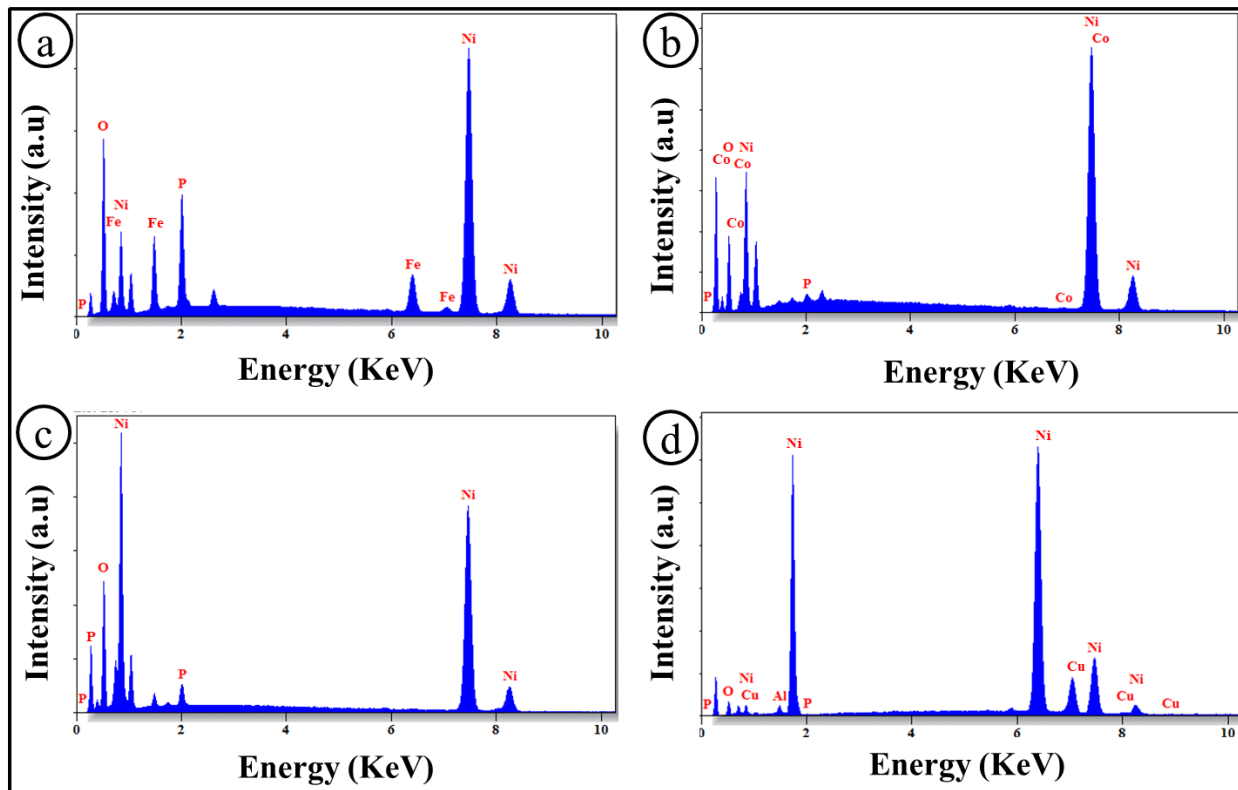

**Figure S2.** EDX spectra of the PS-3D-FeP@NiO|Ni (a), CoP@NiO|Ni (b), NiP@NiO|Ni (c), and CuP@NiO|Ni (d) electrodes.

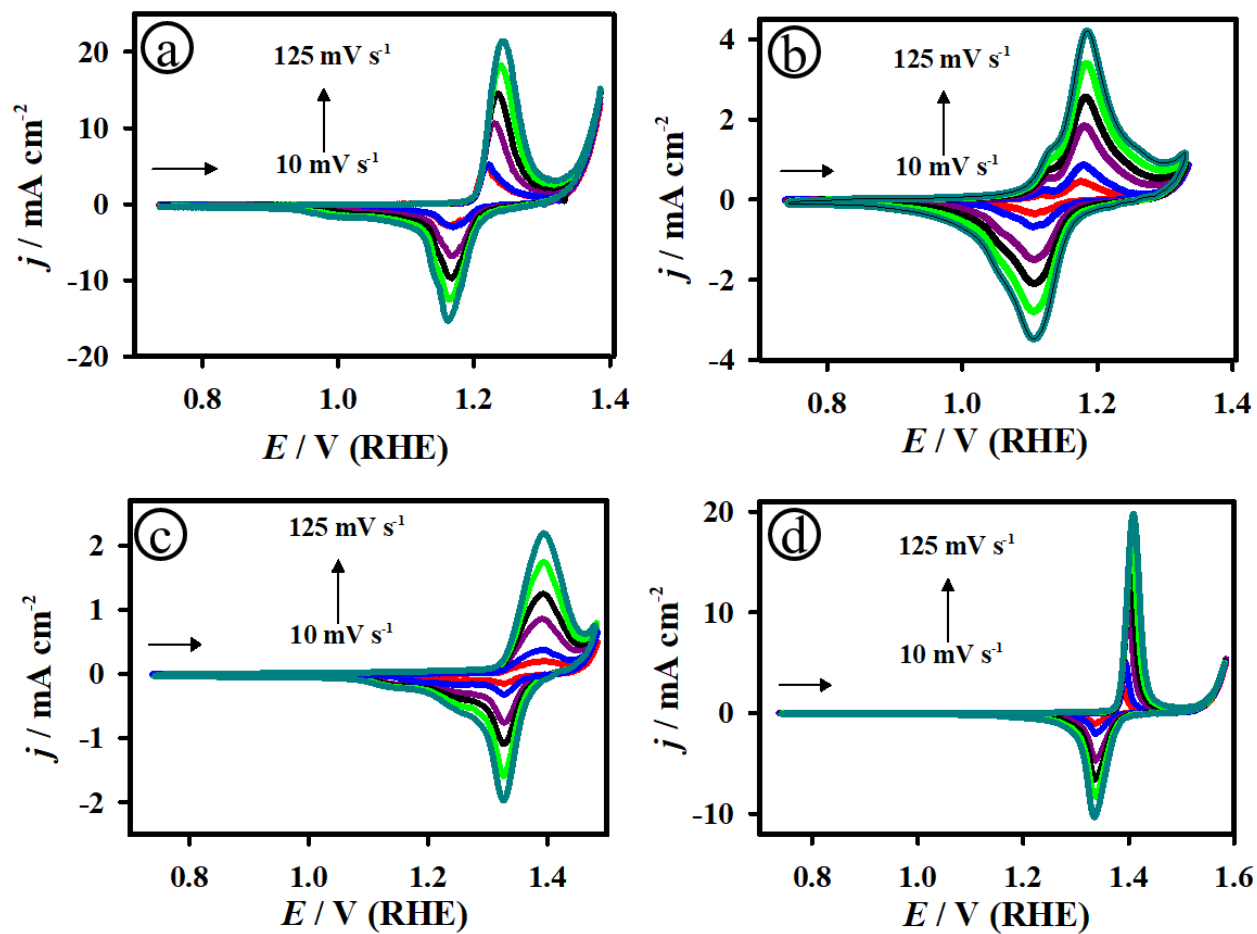

**Figure S3.** CV curves of the PS-3D-FeP@NiO|Ni (a), CoP@NiO|Ni (b), NiP@NiO|Ni (c), and CuP@NiO|Ni (d) electrodes recorded in 1.0 M KOH with the different scan rates, starting from 10 to 125 mV s<sup>-1</sup>.

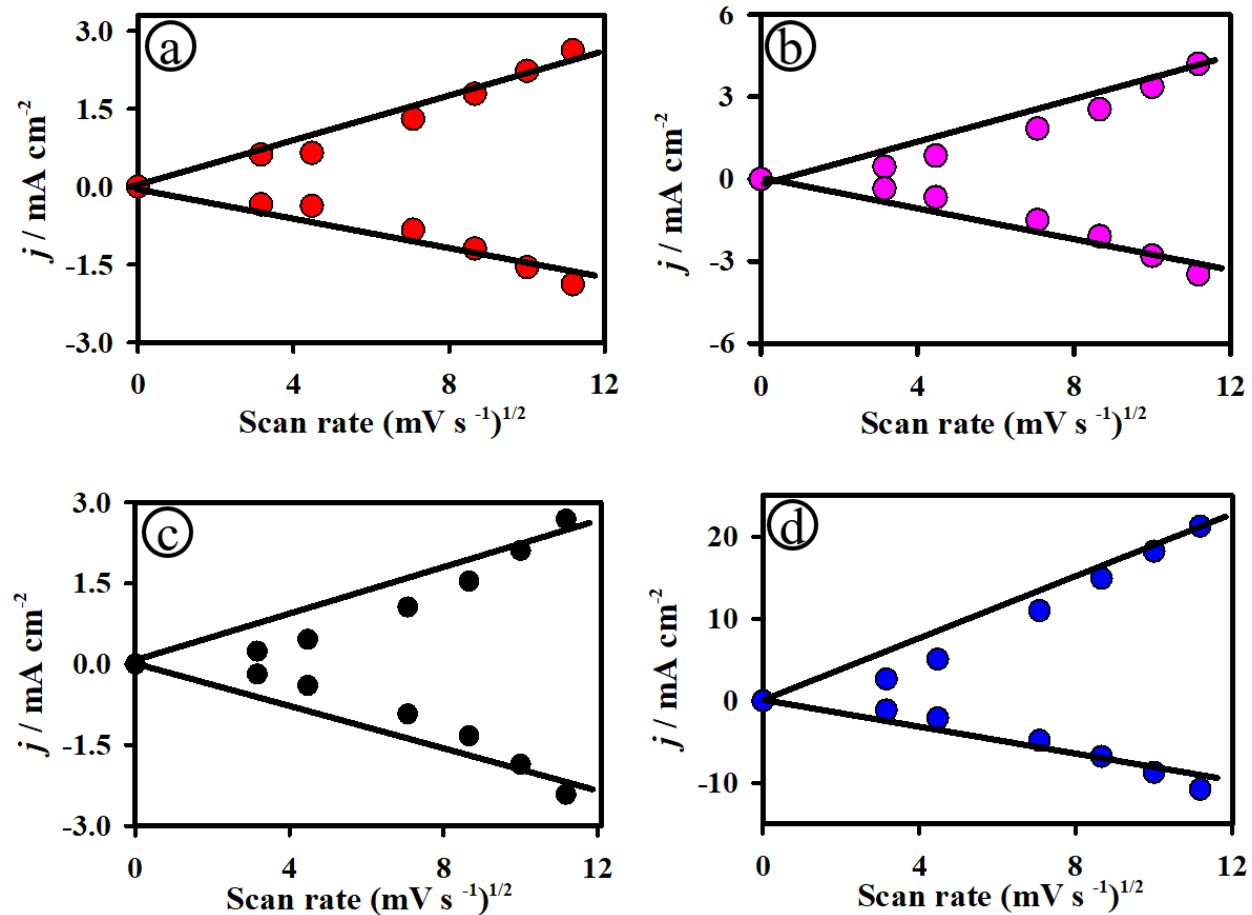

**Figure S4.** The plot of anodic and cathodic peak current densities against the square root of the scan rates for PS-3D-FeP@NiO|Ni (a), CoP@NiO|Ni (b), NiP@NiO|Ni (c), and CuP@NiO|Ni (d).

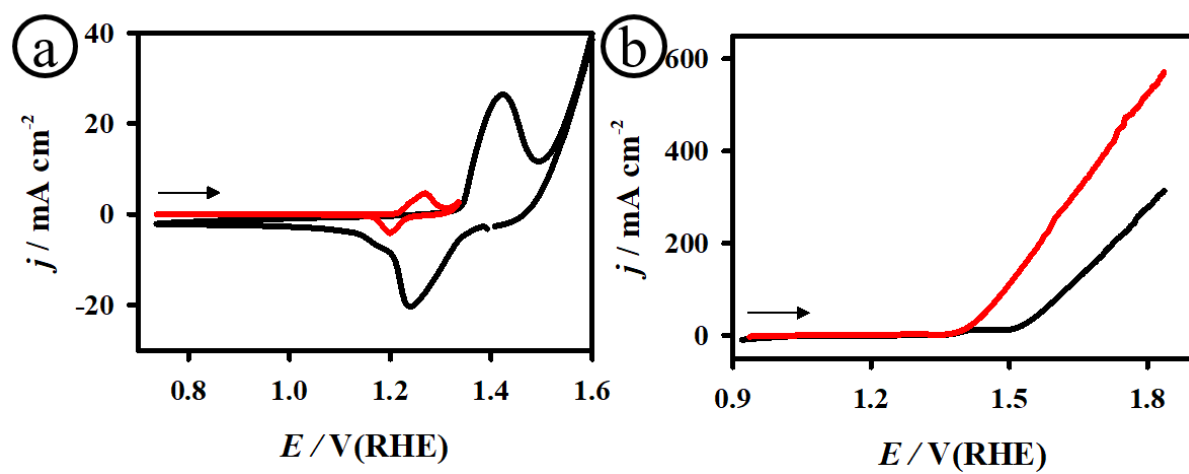

**Figure S5.** CV (a) and LSV (b) curves of the PS-3D-FeP@NiO|Ni (red curve) and FeP|NF (black curve) electrodes recorded in 1.0 M KOH electrolyte.

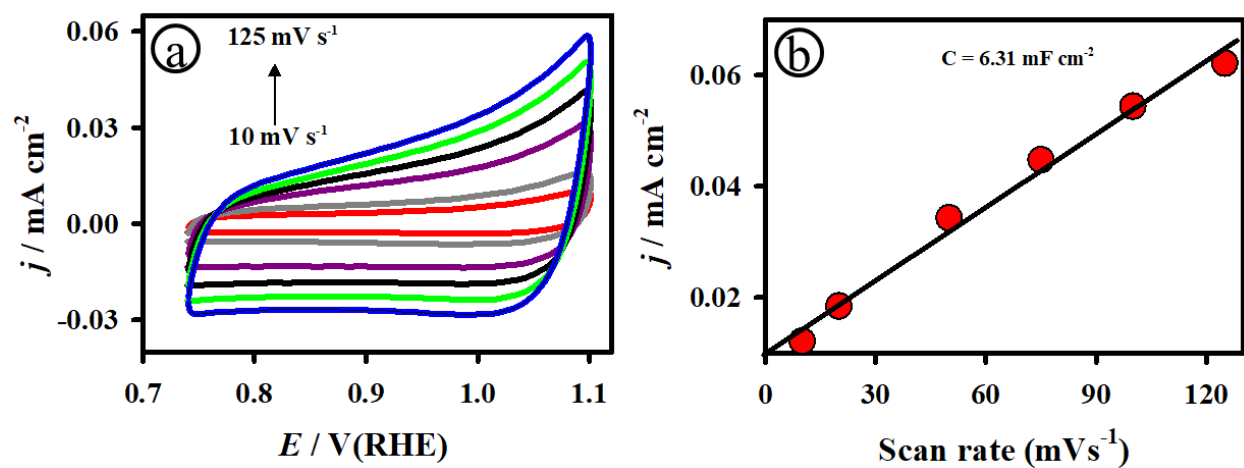

**Figure S6.** (a) CVs of the PS-3D-FeP@NiO|Ni electrode recorded in 1.0 M KOH at different scan rates from 10 to 125  $\text{mV s}^{-1}$ . (b) Plot of current density measured from non-faradaic region of the voltammograms against the function of the scan rates.



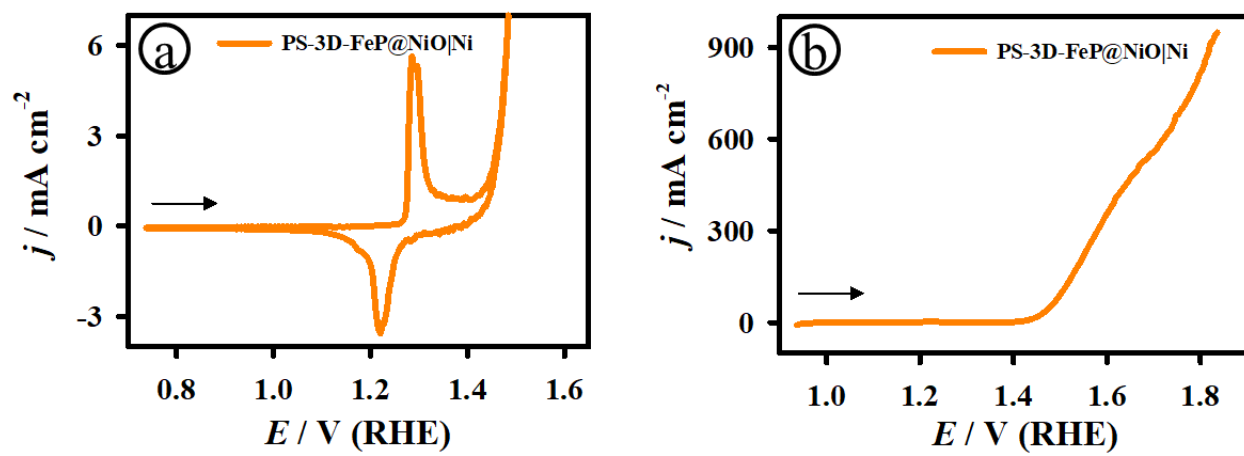

**Figure S7.** CV curve (a) and LSV curves (b) of the PS-3D-FeP@NiO|Ni electrode recorded in 30% KOH.

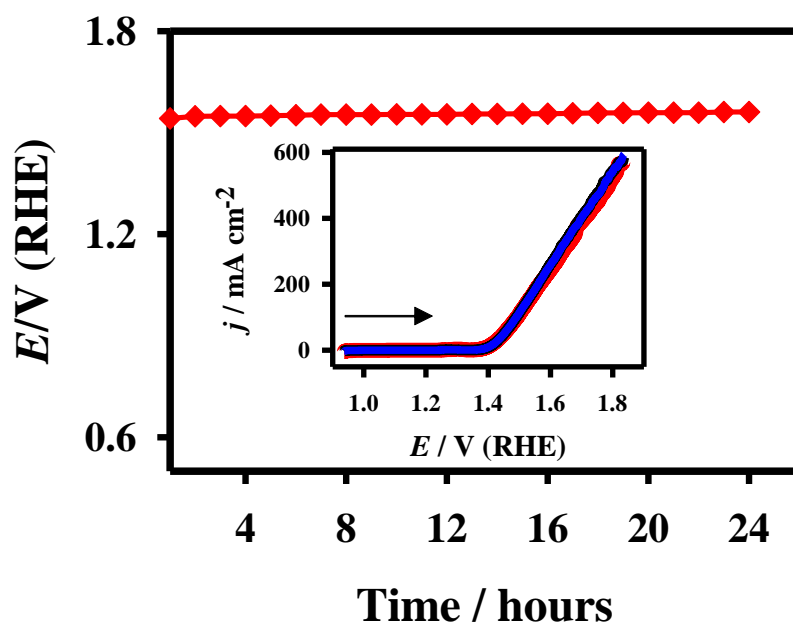

**Figure S8.** Chronopotentiometric curve of the PS-3D-FeP@NiO|Ni electrode recorded in 1.0 M KOH under applied current density of  $\sim 10.0 \text{ mA cm}^{-2}$ . Inset: LSV curves of the PS-3D-FeP@NiO|Ni electrodes. Electrolyte: 1.0 M KOH; Scan rate of  $20 \text{ mV s}^{-1}$ .

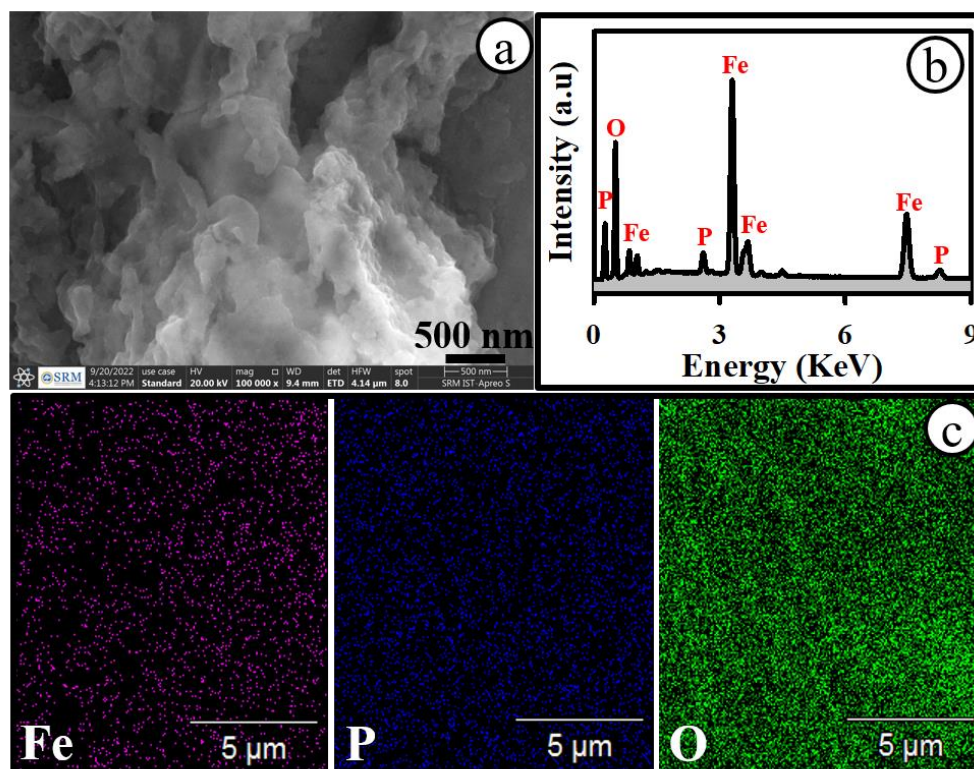

**Figure S9.** HRSEM image (a), EDX spectra (b) and elemental mapping of Fe, P and O (c) for the PS-3D-FeP@NiO|Ni electrode measured after had a long-term stability test.

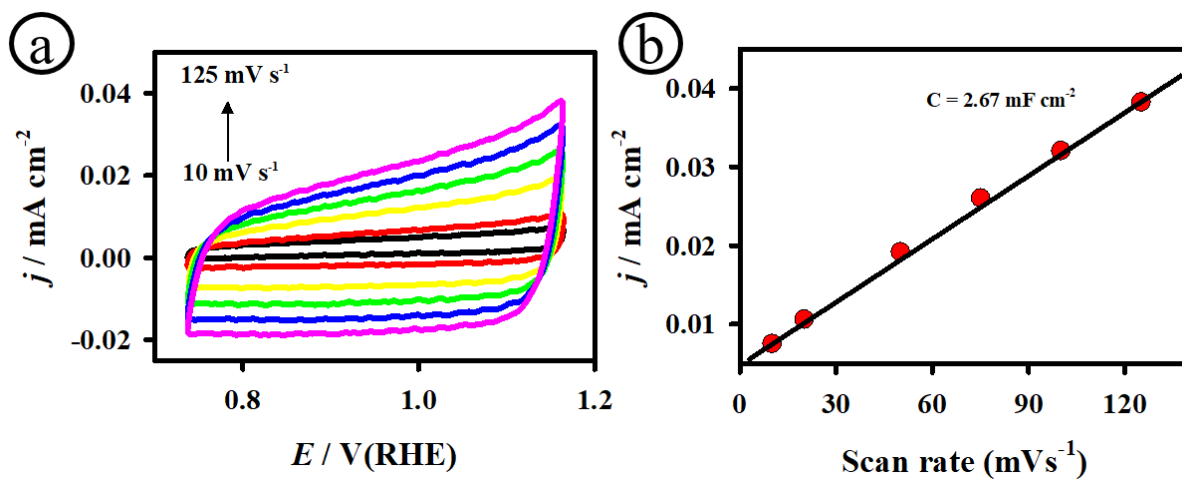

**Figure S10.** (a) CVs of the PS-3D-FeP@NiO|Ni electrode recorded in 1.0 M KOH at different scan rates from 10 to 125  $\text{mV s}^{-1}$  measured after had a long-term stability test. (b) Plot of current density measured from non-faradaic region of the CVs against the function of the scan rates.
